# Supplementary material for: Biofabricated Fatty Acids-Capped Silver Nanoparticles as Potential Antibacterial, Antifungal, Antibiofilm and Anticancer Agents
Source: PubMed Central journal article supplement (PMC7915658; doi:10.3390/ph14020139), 2021-02-09
Supplement: pharmaceuticals-14-00139-s001.pdf [file pharmaceuticals-14-00139-s001.pdf]

**Table. S1.** GS-MS analysis of poly-herbal drug Liv52 extract (PLE).

| Peak (P) | Retention Time | Peak Area (%) | Name of compounds                             | Mol. formula                                  | Mol. Weight | Structure                                                                             |
|----------|----------------|---------------|-----------------------------------------------|-----------------------------------------------|-------------|---------------------------------------------------------------------------------------|
| 1        | 14.796         | 0.16          | Octanoic Acid, 3-Oxo-, Methyl Ester           | C <sub>9</sub> H <sub>16</sub> O <sub>3</sub> | 172         | 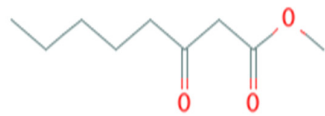   |
| 2        | 15.750         | 1.30          | 1,3-Propanediol, 2-(hydroxymethyl)-2-nitro-   | C <sub>4</sub> H <sub>9</sub> NO <sub>5</sub> | 151         |    |
| 3        | 16.145         | 0.11          | Benzene, 1-(1,5-Dimethyl-4-Hexenyl)-4-Methyl- | C <sub>15</sub> H <sub>22</sub>               | 202         |    |
| 4        | 17.794         | 0.17          | 1-Tridecanol                                  | C <sub>13</sub> H <sub>28</sub> O             | 200         |    |
| 5        | 18.886         | 0.86          | Ar-tumerone                                   | C <sub>15</sub> H <sub>20</sub> O             | 216         |   |
| 6        | 19.155         | 0.55          | Mome Inositol; (methyl α,β-D-glucofuranose)   | C <sub>7</sub> H <sub>14</sub> O <sub>6</sub> | 194         |  |

|    |        |       |                                                           |                   |     |                                                                                       |
|----|--------|-------|-----------------------------------------------------------|-------------------|-----|---------------------------------------------------------------------------------------|
| 7  | 19.441 | 0.25  | Alpha.-tumerone                                           | $C_{15}H_{22}O$   | 218 | 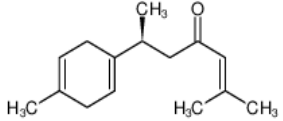   |
| 8  | 20.165 | 1.14  | Tetradecanoic acid                                        | $C_{14}H_{28}O_2$ | 228 |    |
| 9  | 20.604 | 0.10  | 1-Tetradecanol                                            | $C_{14}H_{30}O$   | 214 |    |
| 10 | 21.174 | 0.10  | Neophytadiene                                             | $C_{20}H_{38}$    | 278 |    |
| 11 | 21.489 | 0.19  | Didodecyl phthalate                                       | $C_{32}H_{54}O_4$ | 502 |    |
| 12 | 22.093 | 0.09  | 7,9-Di-tert-butyl-1-oxaspiro(4,5)deca-6,9-diene-2,8-dione | $C_{17}H_{24}O_3$ | 276 |    |
| 13 | 22.298 | 0.25  | Hexadecanoic acid, Methyl Ester                           | $C_{17}H_{34}O_2$ | 270 |  |
| 14 | 22.493 | 0.33  | 9-Eicosyne                                                | $C_{20}H_{38}$    | 278 |  |
| 15 | 22.790 | 21.95 | n-Hexadecanoic acid (Palmitic acid)                       | $C_{16}H_{32}O_2$ | 256 |  |

|    |        |       |                                                     |                     |     |                                                                                       |
|----|--------|-------|-----------------------------------------------------|---------------------|-----|---------------------------------------------------------------------------------------|
| 16 | 23.267 | 0.25  | Azuleno [4,5-b] furan-2<br>(3H)-one,                | $C_{15}H_{18}O_2$   | 230 | 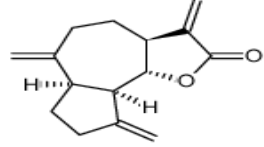   |
| 17 | 23.726 | 0.25  | Palmitic Acid, TMS<br>derivative                    | $C_{19}H_{40}O_2Si$ | 328 |    |
| 18 | 24.325 | 0.32  | 9,12-Octadecadienoic acid,<br>methyl ester          | $C_{19}H_{34}O_2$   | 294 |    |
| 19 | 24.822 | 20.45 | 9,12-Octadecadienoic acid<br>(Z,Z)- (Linoleic Acid) | $C_{18}H_{32}O_2$   | 280 |    |
| 20 | 24.887 | 18.01 | 9-Octadecenoic acid (Z)-<br>(Oleic acid)            | $C_{18}H_{34}O_2$   | 282 |    |
| 21 | 25.147 | 13.99 | Octadecanoic acid (Stearic<br>acid)                 | $C_{18}H_{36}O_2$   | 284 |   |
| 22 | 26.608 | 0.45  | 1-(4-Hydroxy-3-<br>methoxyphenyl)dec-4-en-<br>3-one | $C_{17}H_{24}O_3$   | 276 |  |
| 23 | 27.083 | 0.73  | Z,Z-8,10-Hexadecadien-1-<br>ol                      | $C_{16}H_{30}O$     | 238 |  |

|    |        |       |                                                     |                    |     |                                                                                       |
|----|--------|-------|-----------------------------------------------------|--------------------|-----|---------------------------------------------------------------------------------------|
| 24 | 27.323 | 0.42  | 9-Octadecenoic acid (Z)-                            | $C_{18}H_{34}O_2$  | 282 | 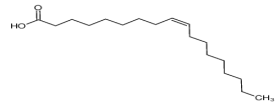   |
| 25 | 27.693 | 0.29  | Phosphonic acid, dioctadecyl ester                  | $C_{36}H_{75}O_3P$ | 586 |    |
| 26 | 28.658 | 0.42  | Ginkgol (TMS)                                       | $C_{24}H_{42}OSi$  | 374 |    |
| 27 | 28.811 | 11.92 | (Z)-3-(pentadec-8-en-1-yl)phenol (Cardanol monoene) | $C_{21}H_{34}O$    | 302 |    |
| 28 | 29.102 | 0.17  | Phenol, 3-pentadecyl-                               | $C_{21}H_{36}O$    | 304 |    |
| 29 | 33.378 | 0.39  | Piperine                                            | $C_{17}H_{19}NO_3$ | 285 |   |
| 30 | 34.058 | 0.26  | Squalene                                            | $C_{30}H_{50}$     | 410 |  |

|    |        |      |                                                                   |                     |     |                                                                                       |
|----|--------|------|-------------------------------------------------------------------|---------------------|-----|---------------------------------------------------------------------------------------|
| 31 | 35.088 | 1.83 | Piperine                                                          | $C_{17}H_{19}NO_3$  | 285 | 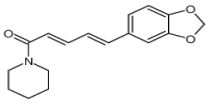   |
| 32 | 35.594 | 0.16 | (2E,4E,10E)-N-Isobutylhexadeca-2,4,10-trienamide                  | $C_{20}H_{35}NO$    | 305 |    |
| 33 | 36.190 | 0.66 | Doconexent, TBDMS derivative                                      | $C_{28}H_{46}O_2Si$ | 442 |    |
| 34 | 38.547 | 0.34 | Stigmasta-5,22-dien-3-ol, (3.beta.,22E)-                          | $C_{29}H_{48}O$     | 412 |    |
| 35 | 39.357 | 0.72 | Stigmast-5-en-3-ol, (3.beta.)-                                    | $C_{29}H_{50}O$     | 414 |   |
| 36 | 40.237 | 0.19 | 2-Hydroxymethyl-2,6,8,8-tetramethyltricyclo[5.2.2.0(1,6)]undecane | $C_{16}H_{28}O$     | 236 |  |

|    |        |            |        |                 |     |                                                                                     |
|----|--------|------------|--------|-----------------|-----|-------------------------------------------------------------------------------------|
| 37 | 40.696 | 0.25       | Lupeol | $C_{30}H_{50}O$ | 426 | 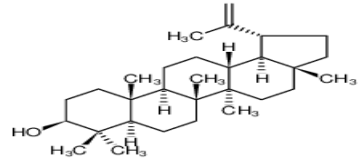 |
|    |        | <b>100</b> |        |                 |     |                                                                                     |
